# Supplementary material for: Can We Agree on What Robots Should be Allowed to Do? An Exercise in Rule Selection for Ethical Care Robots
Source: Springer Nature journal article supplement (doi:10.1007/s12369-019-00612-0), 2019-12-20
Supplement: MOESM1 [file 17521976]

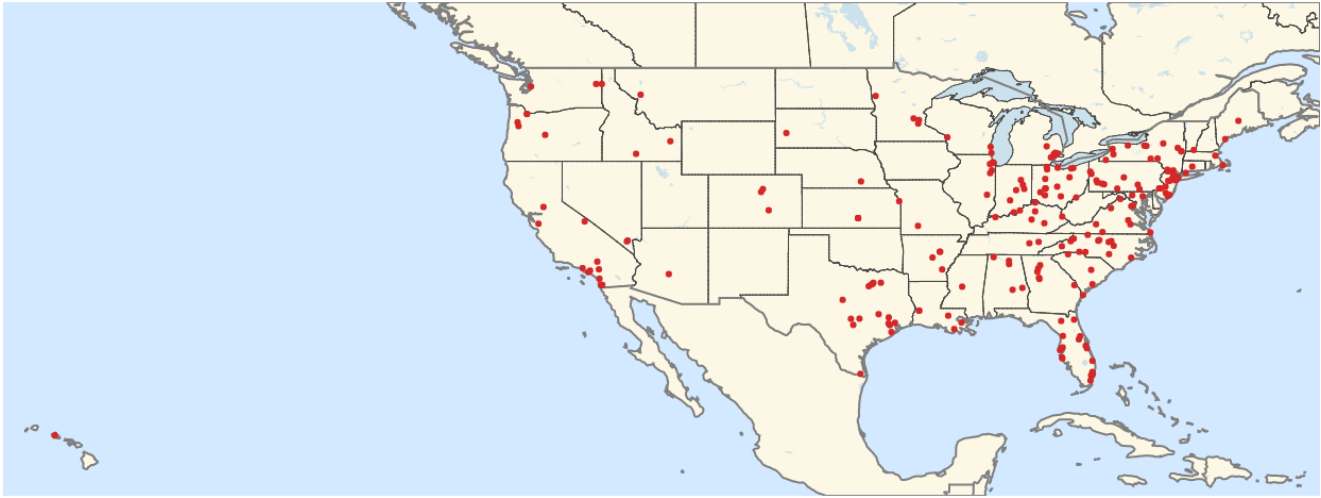

Fig. 4 Map of the respondents' locations as inferred from their IP address.

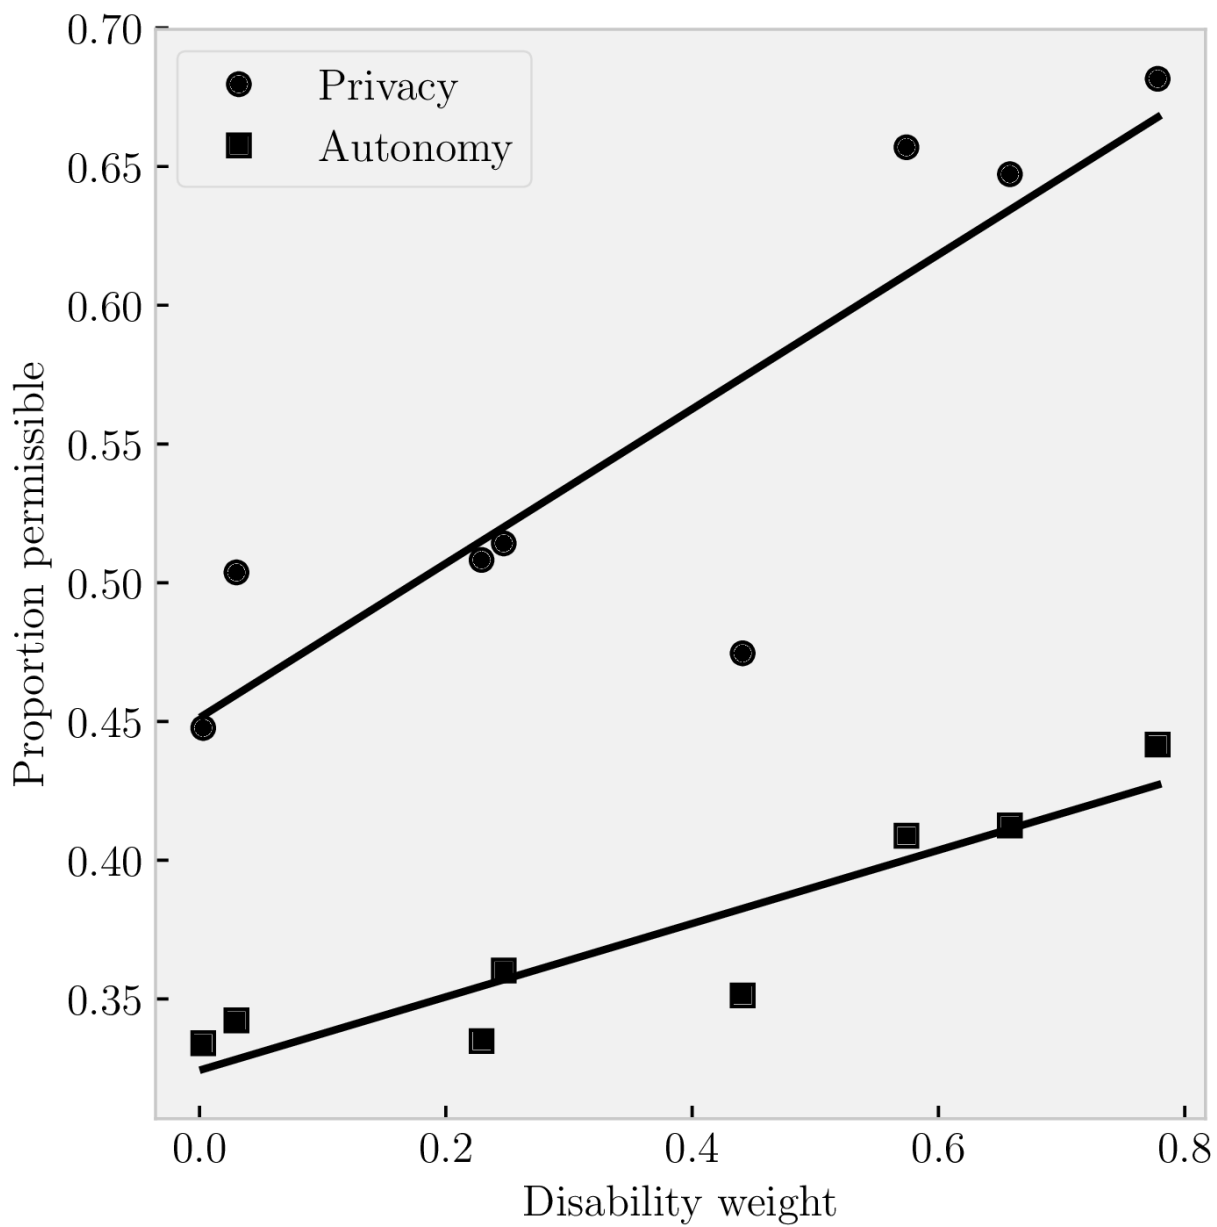

**Fig. 5** Plot of the proportion of permissible actions as a function of the disability weight (table 2). The lines are regression lines (table 3).

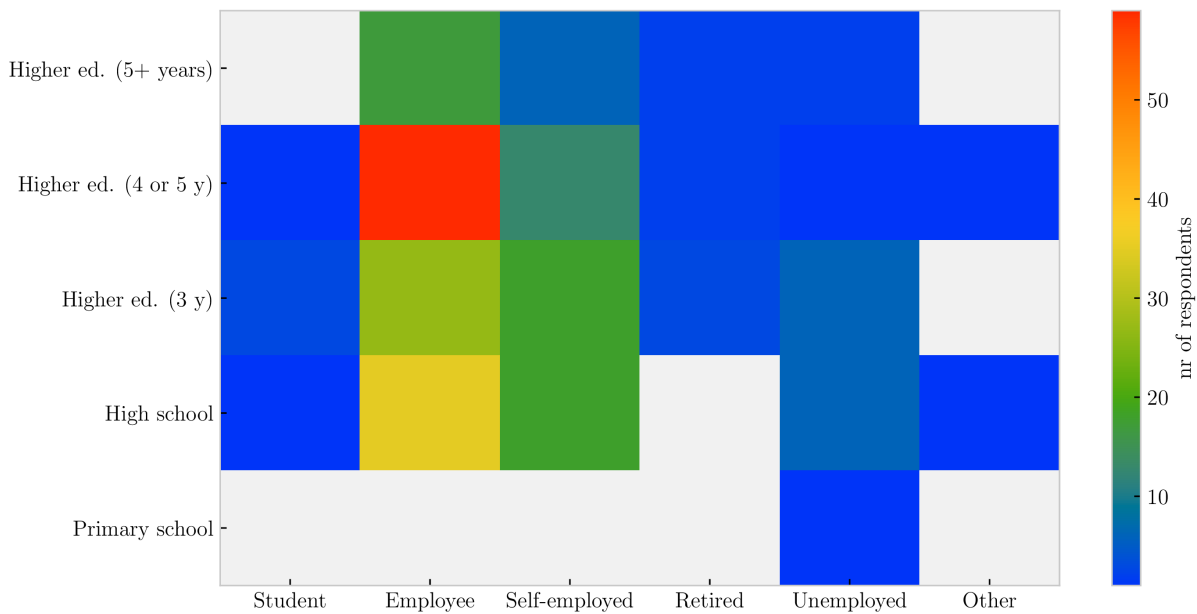

**Fig. 6** Breakdown of the education by the education of the respondents.

**Table 5** Table listing our label for each of the conditions, the label as used in the paper by [Salomon et al. \(2015\)](#) and the description we used (which was based on the descriptions used by [Salomon et al. \(2015\)](#)).

| Our label                  | <a href="#">Salomon et al. (2015)</a> label | Description of condition (taken from <a href="#">Salomon et al. (2015)</a> )                                                                                                                                        |
|----------------------------|---------------------------------------------|---------------------------------------------------------------------------------------------------------------------------------------------------------------------------------------------------------------------|
| Mild vision impairment     | Distance vision: mild impairment            | has some difficulty with distance vision, for example reading signs, but no other problems with eyesight.                                                                                                           |
| Mild anxiety disorder      | Anxiety disorders: mild                     | feels mildly anxious and worried, which makes it slightly difficult to concentrate, remember things, and sleep. The person tires easily but is able to perform daily activities.                                    |
| Severe neck pain           | Neck pain: severe                           | has severe neck pain, and difficulty turning the head and lifting things. The person gets headaches and arm pain, sleeps poorly, and feels tired and worried.                                                       |
| severe diarrhoea           | Diarrhoea: severe                           | has diarrhea three or more times a day with severe belly cramps. The person is very thirsty and feels nauseous and tired.                                                                                           |
| Migraine                   | Migraine                                    | has severe, throbbing head pain and nausea that cause great difficulty in daily activities and sometimes confine the person to bed. Moving around, light, and noise make it worse.                                  |
| severe Parkinson's disease | Parkinson's disease: severe                 | has severe tremors and moves very slowly, which causes great difficulty in walking and daily activities. The person falls easily and has a lot of difficulty talking, swallowing, sleeping, and remembering things. |
| Severe depression          | Major depressive disorder: severe episode   | has overwhelming, constant sadness and cannot function in daily life. The person sometimes loses touch with reality and wants to harm or herself.                                                                   |
| acute Schizophrenia        | Schizophrenia: acute state                  | hears and sees things that are not real and is afraid, confused, and sometimes violent. The person has great difficulty with communication and daily activities, and sometimes wants to harm or kill or herself.    |
